# Supplementary material
Source: publisher figshare collection journal article supplement (https://tandf.figshare.com/ndownloader/files/12862616)
Supplement: Supplementary file 1 [file 12862616]

**Supplementary Table S1.** MEDLINE literature search strategy

1 exp DEPRESSION/ (101380)

2 exp Depressive Disorder/ (98747)

3 exp Antidepressive Agents/ (134795)

4 antidepressant.mp. (38400)

5 exp Venous Thrombosis/ (51170)

6 venous thrombus.mp. (495)

7 exp Venous Thromboembolism/ (8194)

8 exp Pulmonary Embolism/ (36054)

9 deep vein thrombosis.mp. (14517)

10 1 or 2 or 3 or 4 (296898)

11 5 or 6 or 7 or 8 or 9 (90588)

12 10 and 11 (123)

13 limit 12 to (humans and "all adult (19 plus years)") (82)

Each part was specifically translated for searching alternative databases.
